# Supplementary material
Source: PubMed Central journal article supplement (PMC7984229)
Supplement: NIHMS1666869-supplement-supplementary_material.pdf [file NIHMS1666869-supplement-supplementary_material.pdf]

## Supplementary Table S1: PubMed results of the meta-analysis search and reasons for inclusion/exclusion of studies.

As search term, we used “(Colorectal Cancer) AND (Metagenome) AND (fecal) AND (human)” and collected results up to the 21.06.2018.

| Authors          | Title                                                                                                                                             | Year | Journal                                        | doi                           | Exclusion Reason        |
|------------------|---------------------------------------------------------------------------------------------------------------------------------------------------|------|------------------------------------------------|-------------------------------|-------------------------|
| Liang et al      | Fecal Bacteria Act as Novel Biomarkers for Noninvasive Diagnosis of Colorectal Cancer.                                                            | 2017 | Clinical Cancer Research                       | 10.1158/1078-0432.CCR-16-1599 | No shotgun metagenomics |
| Beghini et al    | Large-scale comparative metagenomics of Blastocystis, a common member of the human gut microbiome.                                                | 2017 | The ISME Journal                               | 10.1038/ismej.2017.139        | Unrelated               |
| Butto et al      | Functional relevance of microbiome signatures: The correlation era requires tools for consolidation.                                              | 2017 | The Journal of Allergy and Clinical Immunology | 10.1016/j.jaci.2017.02.010    | Review                  |
| Zhou et al       | Cancer killers in the human gut microbiota: diverse phylogeny and broad spectra.                                                                  | 2017 | Oncotarget                                     | 10.18632/oncotarget.17319     | Unrelated               |
| Tsoi et al       | Peptostreptococcus anaerobius Induces Intracellular Cholesterol Biosynthesis in Colon Cells to Induce Proliferation and Causes Dysplasia in Mice. | 2017 | Gastroenterology                               | 10.1053/j.gastro.2017.01.009  | No shotgun metagenomics |
| Dubinikina et al | Links of gut microbiota composition with alcohol dependence syndrome and alcoholic liver disease.                                                 | 2017 | Microbiome                                     | 10.1186/s40168-017-0359-2     | No CRC samples          |
| Yu et al         | Metagenomic analysis of faecal microbiome as a tool towards targeted non-invasive biomarkers for colorectal cancer.                               | 2017 | Gut                                            | 10.1136/gutjnl-2015-309800    |                         |
| Wong et al       | Gavage of Fecal Samples From Patients With Colorectal Cancer Promotes Intestinal Carcinogenesis in Germ-Free and Conventional Mice.               | 2017 | Gastroenterology                               | 10.1053/j.gastro.2017.08.022  | No human samples        |
| Vogtmann et al   | Colorectal Cancer and the Human Gut Microbiome: Reproducibility with Whole-Genome Shotgun Sequencing.                                             | 2016 | PLoS one                                       | 10.1371/journal.pone.0155362  |                         |
| Estaki et al     | Cardiorespiratory fitness as a predictor of intestinal microbial diversity and distinct metagenomic functions.                                    | 2016 | Microbiome                                     | 10.1186/s40168-016-0189-7     | No CRC samples          |
| Hester et al     | Fecal microbes, short chain fatty acids, and colorectal cancer across racial/ethnic groups.                                                       | 2015 | World Journal of Gastroenterology              | 10.3748/wjg.v21.i9.2759       | No shotgun metagenomics |
| Feng et al       | Gut microbiome development along the colorectal adenoma-carcinoma sequence.                                                                       | 2015 | Nature Communications                          | 10.1038/ncomms7528            |                         |
| Zeller et al     | Potential of fecal microbiota for early-stage detection of colorectal cancer.                                                                     | 2014 | Molecular Systems Biology                      | 10.15252/msb.20145645         |                         |

|                          |                                                                                                                                                        |      |                                                              |                                |                         |
|--------------------------|--------------------------------------------------------------------------------------------------------------------------------------------------------|------|--------------------------------------------------------------|--------------------------------|-------------------------|
| Duboc et al              | Connecting dysbiosis, bile-acid dysmetabolism and gut inflammation in inflammatory bowel diseases.                                                     | 2013 | Gut                                                          | 10.1136/gutjnl-2012-302578     | No CRC samples          |
| Couturier-Maillard et al | NOD2-mediated dysbiosis predisposes mice to transmissible colitis and colorectal cancer.                                                               | 2013 | The Journal of Clinical Investigation                        | 10.1172/JCI62236               | No CRC samples          |
| Shanahan, F.             | The colonic microbiota in health and disease.                                                                                                          | 2013 | Current Opinion in Gastroenterology                          | 10.1097/MOG.0b013e32835a3493   | Review                  |
| Chen et al               | Decreased dietary fiber intake and structural alteration of gut microbiota in patients with advanced colorectal adenoma.                               | 2013 | The American Journal of Clinical Nutrition                   | 10.3945/ajcn.112.046607        | No shotgun metagenomics |
| Ou et al                 | Diet, microbiota, and microbial metabolites in colon cancer risk in rural Africans and African Americans.                                              | 2013 | The American Journal of Clinical Nutrition                   | 10.3945/ajcn.112.056689        | No shotgun metagenomics |
| Holma et al              | Colonic methane production modifies gastrointestinal toxicity associated with adjuvant 5-fluorouracil chemotherapy for colorectal cancer.              | 2013 | Journal of Clinical Gastroenterology                         | 10.1097/MCG.0b013e3182680201   | No CRC samples          |
| Brim et al               | Microbiome analysis of stool samples from African Americans with colon polyps.                                                                         | 2013 | PLoS one                                                     | 10.1371/journal.pone.0081352   | No shotgun metagenomics |
| Kelly, CP                | Aspects of large intestinal health and disease.                                                                                                        | 2013 | Current Opinion in Gastroenterology Pharmacological Research | 10.1097/MOG.0b013e32835af1a6   | Review                  |
| Walker et al             | Therapeutic modulation of intestinal dysbiosis                                                                                                         | 2013 | Pharmacological Research                                     | 10.1016/j.phrs.2012.09.008     | Review                  |
| Castellarin et al        | Fusobacterium nucleatum infection is prevalent in human colorectal carcinoma.                                                                          | 2012 | Genome Research                                              | 10.1101/gr.126516.111          | No shotgun metagenomics |
| Araujo-Perez et al       | Differences in microbial signatures between rectal mucosal biopsies and rectal swabs.                                                                  | 2012 | Gut Microbes                                                 | 10.4161/gmic.22157             | No shotgun metagenomics |
| Odamaki et al            | Effect of the oral intake of yogurt containing Bifidobacterium longum BB536 on the cell numbers of enterotoxigenic Bacteroides fragilis in microbiota. | 2012 | Anaerobe                                                     | 10.1016/j.anaerobe.2011.11.004 | No shotgun metagenomics |
| Wang et al               | Structural segregation of gut microbiota between colorectal cancer patients and healthy volunteers.                                                    | 2012 | The ISME Journal                                             | 10.1038/ismej.2011.109         | No shotgun metagenomics |
| Thomas et al             | New insights into the impact of the intestinal microbiota on health and disease: a symposium report.                                                   | 2012 | The British Journal of Nutrition                             | 10.1017/S0007114511006970      | Review                  |
| Zella et al              | Distinct microbiome in pouchitis compared to healthy pouches in ulcerative colitis and familial adenomatous polyposis.                                 | 2011 | Inflammatory bowel disease                                   | 10.1002/ibd.21460              | No CRC samples          |
| Sobhani et al            | Microbial dysbiosis in colorectal cancer (CRC) patients.                                                                                               | 2011 | PLoS one                                                     | 10.1371/journal.pone.0016393   | No shotgun metagenomics |

**Supplementary Table S2: Extended subject information for the eight included metagenomics studies.**

Statistical associations between meta-variables and disease status were assessed using Fisher's Exact test for sex and Wilcoxon tests for BMI and age. Healthy controls in the DE study did not undergo colonoscopy.

|                                        | FR                                |             | AT                                     |             | CN                            |                             | US                                       |             | DE            |             | IT1               |            | IT2        |            | JP                    |                   |
|----------------------------------------|-----------------------------------|-------------|----------------------------------------|-------------|-------------------------------|-----------------------------|------------------------------------------|-------------|---------------|-------------|-------------------|------------|------------|------------|-----------------------|-------------------|
|                                        | CTR                               | CRC         | CTR                                    | CRC         | CTR                           | CRC                         | CTR                                      | CRC         | CTR           | CRC         | CTR               | CRC        | CTR        | CRC        | CTR                   | CRC               |
| N                                      | 61                                | 53          | 63                                     | 46          | 54                            | 74                          | 52                                       | 52          | 60            | 60          | 24                | 29         | 28         | 32         | 40                    | 40                |
| Sex                                    |                                   |             |                                        |             |                               |                             |                                          |             |               |             |                   |            |            |            |                       |                   |
| Female                                 | 33                                | 24          | 26                                     | 18          | 21                            | 26                          | 15                                       | 15          | 28            | 24          | 11                | 6          | 12         | 9          | 16                    | 19                |
| Male                                   | 28                                | 29          | 37                                     | 28          | 33                            | 48                          | 37                                       | 37          | 32            | 36          | 13                | 23         | 16         | 23         | 24                    | 21                |
| p-value                                | 0.45                              |             | 0.85                                   |             | 0.71                          |                             | 1                                        |             | 0.58          |             | 0.11              |            | 0.28       |            | 0.63                  |                   |
| BMI                                    |                                   |             |                                        |             |                               |                             |                                          |             |               |             |                   |            |            |            |                       |                   |
| Mean (SD)                              | 24.7 (3.2)                        | 25.6 (3.7)  | 27.6 (3.7)                             | 26.5 (3.5)  | 23.5 (3.0)                    | 24.0 (3.2)                  | 25.3 (4.3)                               | 24.9 (4.2)  | 24.9 (3.2)    | 26.2 (4.0)  | 25.6 (3.7)        | 25.7 (4.1) | 24.6 (3.8) | 26.8 (4.3) | 23.1 (2.4)            | 22.4 (2.7)        |
| p-value                                | 0.49                              |             | 0.10                                   |             | 0.11                          |                             | 0.63                                     |             | 0.04          |             | 0.84              |            |            |            | 0.26                  |                   |
| Age                                    |                                   |             |                                        |             |                               |                             |                                          |             |               |             |                   |            |            |            |                       |                   |
| Mean (SD)                              | 60.6 (11.4)                       | 66.8 (10.9) | 67.1 (6.3)                             | 67.1 (10.9) | 61.8 (5.7)                    | 66.0 (10.6)                 | 61.2 (11.0)                              | 61.8 (13.6) | 57.6 (11.1)   | 63.5 (12.6) | 67.9 (7.0)        | 71.4 (8.2) | 57.8 (8.3) | 58.4 (8.4) | 63.2 (12.2)           | 59.0 (12.8)       |
| p-value                                | 0.01                              |             | 0.63                                   |             | 0.01                          |                             | 0.72                                     |             | 0.01          |             | 0.13              |            |            |            | 0.09                  |                   |
| CRC Stage                              |                                   |             |                                        |             |                               |                             |                                          |             |               |             |                   |            |            |            |                       |                   |
| 0/I                                    | 15                                |             | 24                                     |             | 18                            |                             | 0                                        |             | 18            |             |                   |            |            |            |                       |                   |
| II                                     | 7                                 |             | 9                                      |             | 22                            |                             | 12                                       |             | 20            |             |                   |            |            |            |                       |                   |
| III                                    | 10                                |             | 9                                      |             | 26                            |                             | 21                                       |             | 9             |             |                   |            |            |            |                       | 40 (stage III-IV) |
| IV                                     | 21                                |             | 3                                      |             | 8                             |                             | 18                                       |             | 13            |             |                   |            |            |            |                       |                   |
| Locali-<br>sation                      |                                   |             |                                        |             |                               |                             |                                          |             |               |             |                   |            |            |            |                       |                   |
| Left<br>Colon                          | 27                                |             | 11                                     |             | 26                            |                             | 19                                       |             | 16            |             | 10                |            |            |            |                       |                   |
| Right<br>Colon                         | 17                                |             | 8                                      |             | 11                            |                             | 15                                       |             | 15            |             | 9                 |            |            |            |                       |                   |
| Rectum                                 | 9                                 |             | 27                                     |             | 28                            |                             | 13                                       |             | 26            |             | 9                 |            |            |            |                       |                   |
| Sampling<br>relative to<br>Colonoscopy | All before                        |             | All before                             |             | 30<br>before<br>24 after      | 21<br>before<br>52<br>after | All after                                |             | none<br>after |             |                   |            |            |            |                       |                   |
| Original<br>Publication                | Zeller et al. <i>MSB</i> 2014 [1] |             | Feng et al. <i>Nat Commun</i> 2015 [2] |             | Yu et al. <i>Gut</i> 2017 [3] |                             | Vogtmann et al. <i>PLoS One</i> 2016 [4] |             | This study    |             | Thomas et al. [5] |            |            |            | Courtesy of T. Yamada |                   |

### Supplementary Table S5: Metabolomic studies performed in colorectal cancer tissue and fecal matter support the enrichment of gut metabolic modules (GMMs) in colorectal cancer metagenomes

For the CRC-associated gut metabolic modules (two-sided blocked Wilcoxon, n=574, see Fig. 4a), differential abundance of the input molecules was checked in four metabolomics studies. Three studies (Hirayama et al. 2009 [6], Denkert et al. 2008 [7], Mal et al. 2012 [8]) performed experiments using CRC and healthy control tissue, whereas one study (Weir et al. 2013 [9]) assessed metabolites in fecal matter of CRC patients and healthy controls. An upward arrow (↑) indicates that the metabolite was found to be significantly enriched in CRC tissue or fecal matter of CRC patients and a downward arrow (↓) a significant depletion of the metabolite. Gut metabolic modules are ordered by significance and direction of change, corresponding to Fig. 4a.

|                                           | GMM    | Name                              | Input                                        | Output                                         | Experiments in CRC tissue |                        |             | Experiments in fecal matter |
|-------------------------------------------|--------|-----------------------------------|----------------------------------------------|------------------------------------------------|---------------------------|------------------------|-------------|-----------------------------|
|                                           |        |                                   |                                              |                                                | Hirayama et al.           | Denkert et al.         | Mal et al.  | Weir et al.                 |
| Modules down-regulated in CRC metagenomes | MF0015 | fructose degradation              | [fructose 1-phosphate]                       | [fructose 1,6-bisphosphate]                    |                           | fructose 1-phosphate ↓ |             |                             |
|                                           | MF0102 | sulfate reduction (dissimilatory) | [sulfate, H <sub>2</sub> ,]                  | [hydrogen sulfide]                             |                           |                        |             |                             |
|                                           | MF0078 | lactaldehyde degradation          | [lactaldehyde]                               | [propane-1,2-diol]                             |                           |                        |             |                             |
|                                           | MF0002 | fructan degradation               | [fructan]                                    | [fructose]                                     |                           |                        |             |                             |
|                                           | MF0017 | galactose degradation             | [galactose]                                  | [glucose 6-phosphate]                          |                           | galactose ↓            | galactose ↓ |                             |
|                                           | MF0058 | lysine degradation II             | [lysine]                                     | [CO <sub>2</sub> , cadaverine]                 |                           |                        |             |                             |
|                                           | MF0092 | lactate production                | [pyruvate]                                   | [lactate]                                      | pyruvate ↓                |                        |             |                             |
|                                           | MF0047 | glutamine degradation II          | [glutamine, 2-oxoglutarate]                  | [glutamate]                                    |                           | glutamine ↓            |             |                             |
|                                           | MF0090 | ethanol production I              | [pyruvate]                                   | [formate, ethanol]                             | pyruvate ↓                |                        |             |                             |
|                                           | MF0010 | sucrose degradation I             | [sucrose]                                    | [fructose 6-phosphate, glucose 6-phosphate]    |                           |                        |             |                             |
|                                           | MF0001 | arabinoxylan degradation          | [arabinoxylan]                               | [arabinose, xylose]                            |                           |                        |             |                             |
| Modules up-regulated in CRC metagenomes   | MF0016 | fucose degradation                | [fucose]                                     | [lactaldehyde, glyceraldehyde 3-phosphate]     |                           |                        |             |                             |
|                                           | MF0028 | aspartate degradation I           | [aspartate, 2-oxoglutarate]                  | [glutamate, oxaloacetate]                      | aspartate ↑               |                        | aspartate ↑ | aspartate ↑                 |
|                                           | MF0044 | cysteine degradation I            | [cysteine]                                   | [NH <sub>3</sub> , H <sub>2</sub> S, pyruvate] | cysteine ↑                | cysteine ↑             |             |                             |
|                                           | MF0072 | pyruvate dehydrogenase complex    | [pyruvate]                                   | [CO <sub>2</sub> , acetyl-CoA]                 |                           |                        |             |                             |
|                                           | MF0027 | tyrosine degradation II           | [tyrosine]                                   | [phenol, pyruvate, NH <sub>3</sub> ]           | tyrosine ↑                |                        |             |                             |
|                                           | MF0101 | nitrate reduction (dissimilatory) | [nitrate]                                    | [NH <sub>3</sub> ]                             |                           |                        |             |                             |
|                                           | MF0045 | cysteine degradation II           | [cysteine, 2-oxoglutarate, hydrogen cyanide] | [pyruvate, glutamate, thiocyanate]             | cysteine ↑                | cysteine ↑             |             |                             |

|                                         |        |                           |                                         |                                                                      |              |             |                  |               |
|-----------------------------------------|--------|---------------------------|-----------------------------------------|----------------------------------------------------------------------|--------------|-------------|------------------|---------------|
|                                         | MF0075 | acetate to acetyl-CoA     | [acetate]                               | [acetyl-CoA]                                                         |              |             |                  | acetic acid ↑ |
|                                         | MF0034 | alanine degradation II    | [2-oxoglutarate, alanine]               | [glutamate, pyruvate]                                                | alanine ↑    | alanine ↑   | alanine ↑        | alanine ↑     |
| Modules up-regulated in CRC metagenomes | MF0096 | succinate production      | [phosphoenolpyruvate, CO <sub>2</sub> ] | [succinate]                                                          |              |             |                  |               |
|                                         | MF0057 | lysine degradation I      | [lysine, acetyl-CoA]                    | [NH <sub>3</sub> , butanoate, acetoacetyl-CoA]                       | lysine ↑     | lysine ↑    |                  | lysine ↑      |
|                                         | MF0040 | proline degradation       | [proline]                               | [glutamate]                                                          | proline ↑    | proline ↑   | proline ↑        | proline ↑     |
|                                         | MF0031 | glutamate degradation II  | [glutamate]                             | [CO <sub>2</sub> , 4-aminobutanoate]                                 | glutamate ↑  | glutamate ↑ |                  | glutamate ↑   |
|                                         | MF0103 | mucin degradation         | [mucin]                                 | [NA]                                                                 |              |             |                  |               |
|                                         | MF0095 | propionate production III | [pyruvate, succinyl-CoA]                | [propanoyl-CoA, oxaloacetate]                                        |              |             |                  |               |
|                                         | MF0088 | butyrate production I     | [crotonyl-CoA]                          | [butanoate]                                                          |              |             |                  |               |
|                                         | MF0083 | succinate consumption     | [succinate, acetyl-CoA]                 | [crotonyl-CoA, acetate]                                              | succinate ↑  |             | succinate ↑      |               |
|                                         | MF0046 | glutamine degradation I   | [glutamine]                             | [glutamate, NH <sub>3</sub> ]                                        |              |             |                  |               |
|                                         | MF0032 | glutamate degradation III | [glutamate]                             | [NH <sub>3</sub> , pyruvate, acetate]                                | glutamate ↑  | glutamate ↑ |                  | glutamate ↑   |
|                                         | MF0056 | histidine degradation     | [histidine]                             | [NH <sub>3</sub> , formate, glutamate]                               | histidine ↑  |             |                  |               |
|                                         | MF0035 | glycine degradation       | [glycine, tetrahydrofolate]             | [CO <sub>2</sub> , NH <sub>3</sub> , 5,10-methylenetetrahydrofolate] | glycine ↑    | glycine ↑   | glycine ↑        | glycine ↑     |
|                                         | MF0025 | tryptophan degradation    | [tryptophan]                            | [indole, NH <sub>3</sub> , pyruvate]                                 | tryptophan ↑ |             | Picolinic acid ↑ |               |

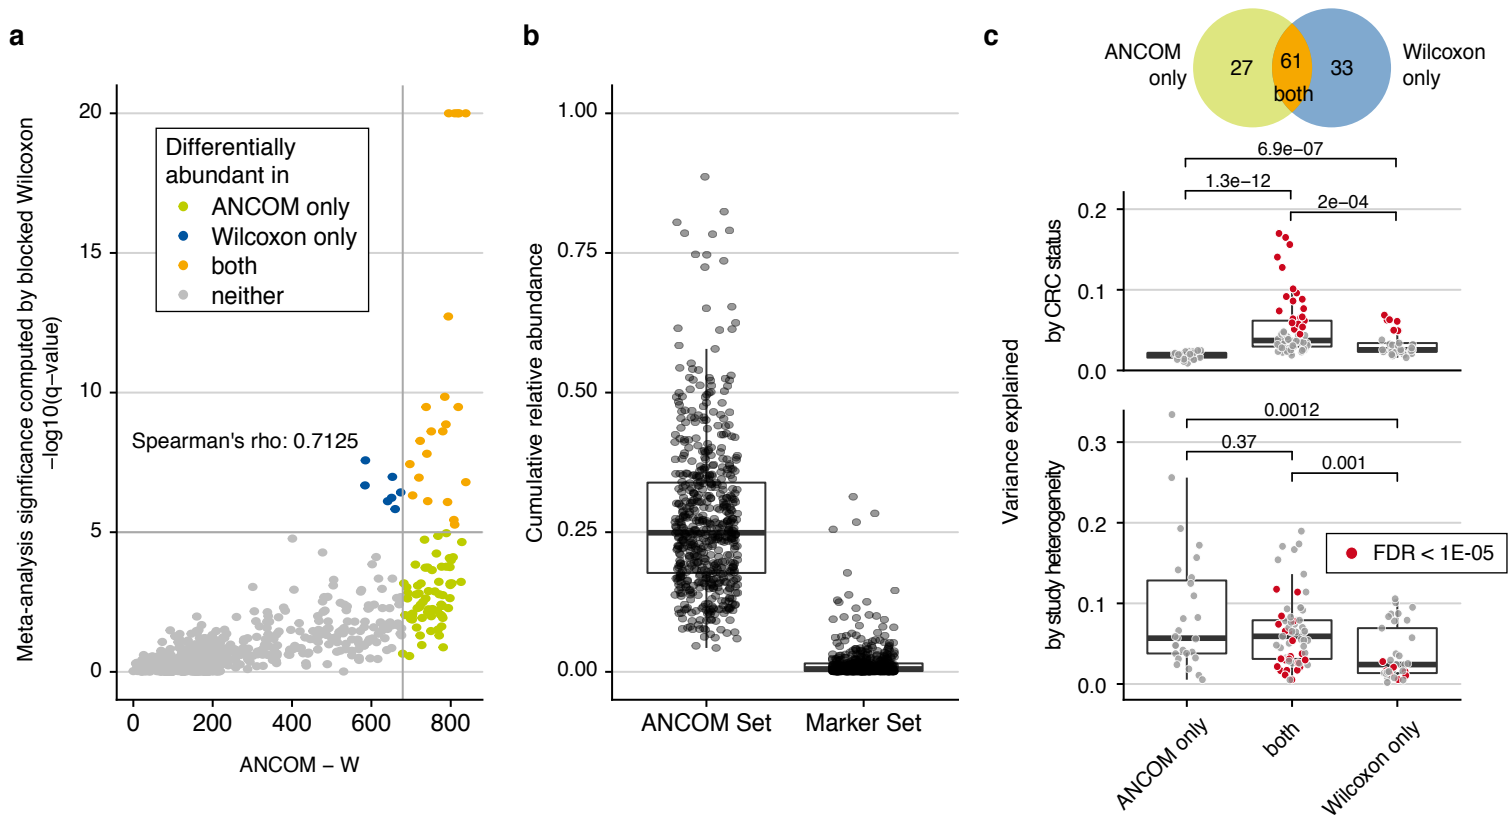

**Figure S1: Results from blocked Wilcoxon test are unlikely to be confounded by compositionality**

**(a)** CRC enrichment was tested by confounder-aware ANCOM (Mandal et al. *Microb Ecol Health Dis* 2015 [10]) and the two-sided blocked Wilcoxon test ( $n=574$  independent observations, see Methods). As ANCOM does not output a p-value but rather an effect size called W, the values for W are plotted against the q-values determined by the blocked Wilcoxon for all gut microbial species. In order to call a species differentially abundant between the two groups (CRC vs control), ANCOM determines a decision boundary on the W values. Dots are color-coded according to whether the Wilcoxon test returned significant results or ANCOM's W was higher than the respective decision boundary. **(b)** The plots shows for the set of species called as differentially abundant by ANCOM (ANCOM set) and the set of marker species (FDR < 1E-05, see Fig. 1c) the cumulative relative abundance in all samples ( $n=575$ ). In the set of marker species, the cumulative relative abundance is below 3% in 90% of the samples, indicating that these are unlikely to have changed solely by compositional effects. **(c)** The size of the intersection and set differences between the ANCOM set and the extended set of marker species (FDR < 0.005, see Fig. 1ab) are shown in the Venn diagram. For the species in each group, the boxplots below show the variance explained by CRC status and by study heterogeneity (see Methods, Fig. 1d). The species uniquely identified by ANCOM seem to be more confounded by study heterogeneity. P-values were computed by two-sided Wilcoxon test. In all boxplots, boxes denote interquartile ranges (IQR) with the median as thick black line and whiskers extending up to the most extreme points within 1.5-fold IQR.

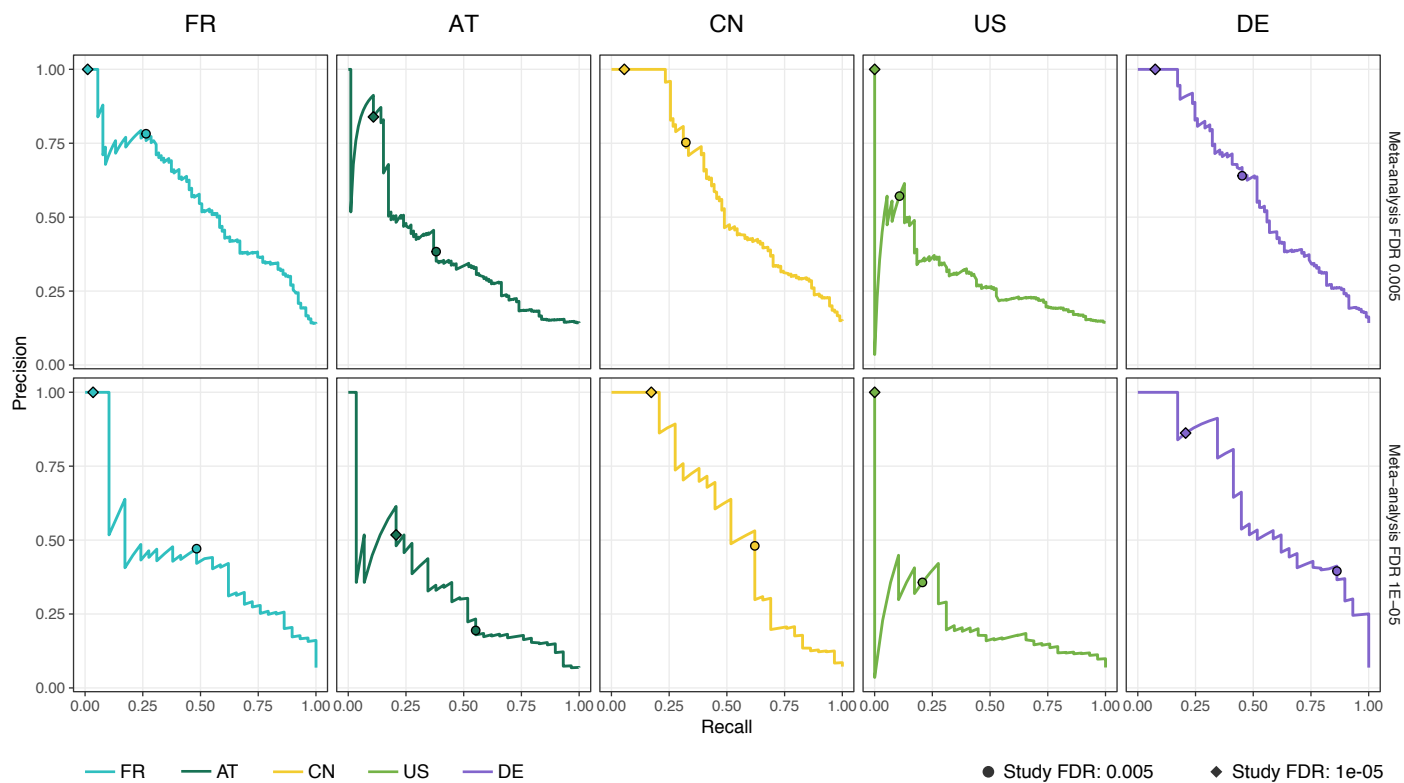

**Figure S2: Retrospective analysis of study sensitivity and precision for detection of CRC-associated microbial species identified in meta-analysis.**

Precision-recall plots for the different studies using the meta-analysis set of associated species at FDR 0.005 ( $n=94$ , top row) and 1E-05 ( $n=29$ , bottom row) as “true” set (tested by two-sided blocked Wilcoxon test, see Methods) and the naive (uncorrected) within-study significance (tested by two-sided Wilcoxon test) as predictor. Circles and diamonds indicate precision and recall of within-study significance cutoffs of 0.005 and 1E-05, respectively.

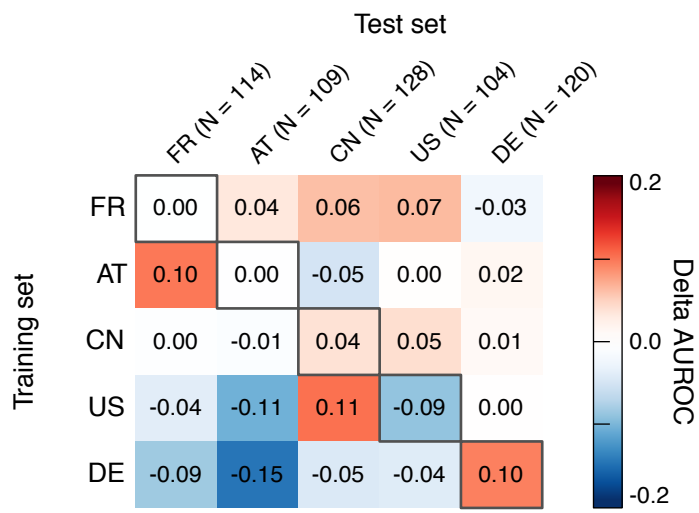

**Figure S3: Performance differences between LASSO and Random Forest classification models.**

Classification accuracy as measured by AUROC was compared between LASSO models (see **Fig. 3a**) and Random Forest models trained on taxonomic abundance profiles. Positive Delta AUROC values (red) indicate better performance for the Random Forest classifier, whereas negative values (blue) represent better performance of the LASSO models.



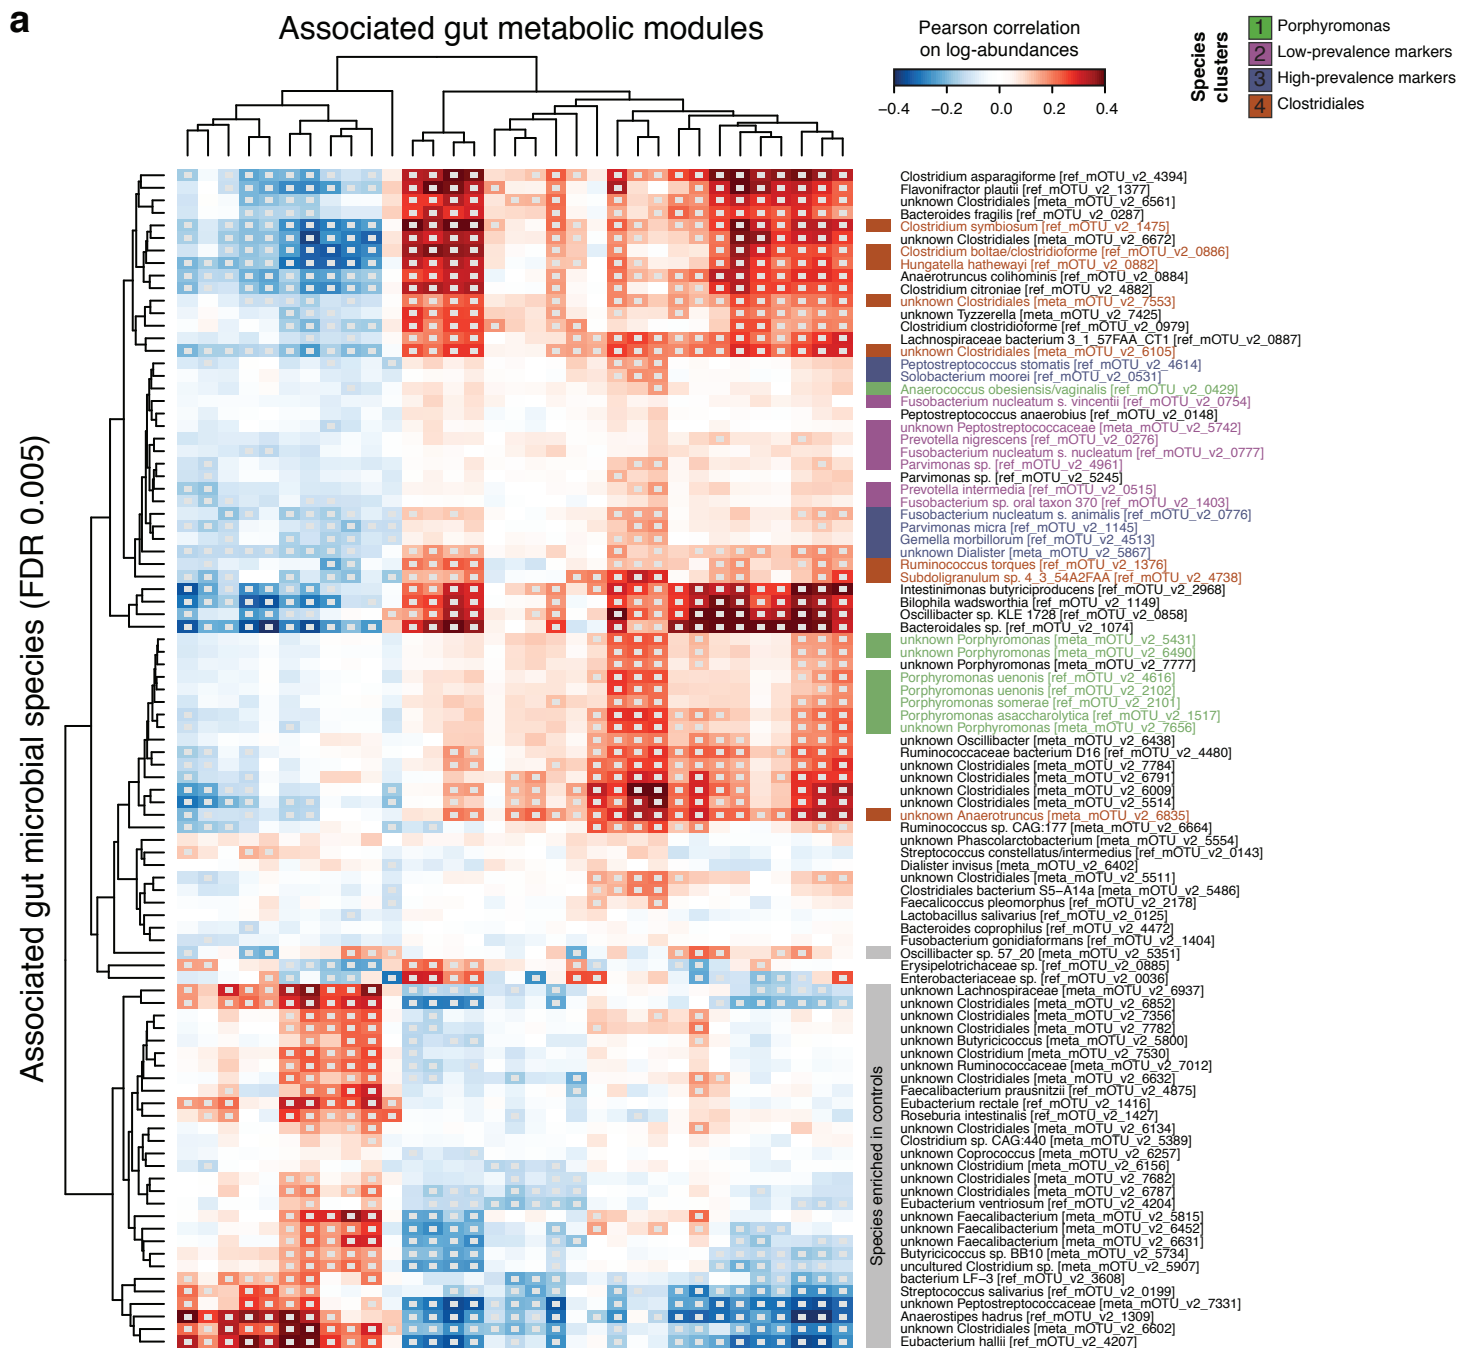

**Figure S4: Correlation between CRC-associated species and gut metabolic modules.**

(a) Pearson correlations (in log space) between CRC-associated species (at an FDR of 0.005) and CRC-associated gut metabolic modules (GMMs, see Fig. 4a) were clustered using the WPGMA algorithm implemented in the *hclust* function in R. Significant correlations ( $p$ -value  $< 0.005$ ) are highlighted by grey squares inside the heatmap. Species are labeled either as enriched in controls (grey boxes) or according to the clustering described in Fig. 2 and Supplementary Fig. 6 defined on the core set of 29 CRC-associated species. (b) Mean squared error is shown for 10-fold cross-validated elastic net models predicting the abundance of each GMM based on either all species or the core set of CRC-associated species. Models based on all species can significantly better predict the observed GMM abundances compared to the core set of markers. P-value in the legend was computed by two-sided paired Wilcoxon test ( $n=66$  paired observations). GMMs are labeled with the higher-level classification from Fig. 4a.

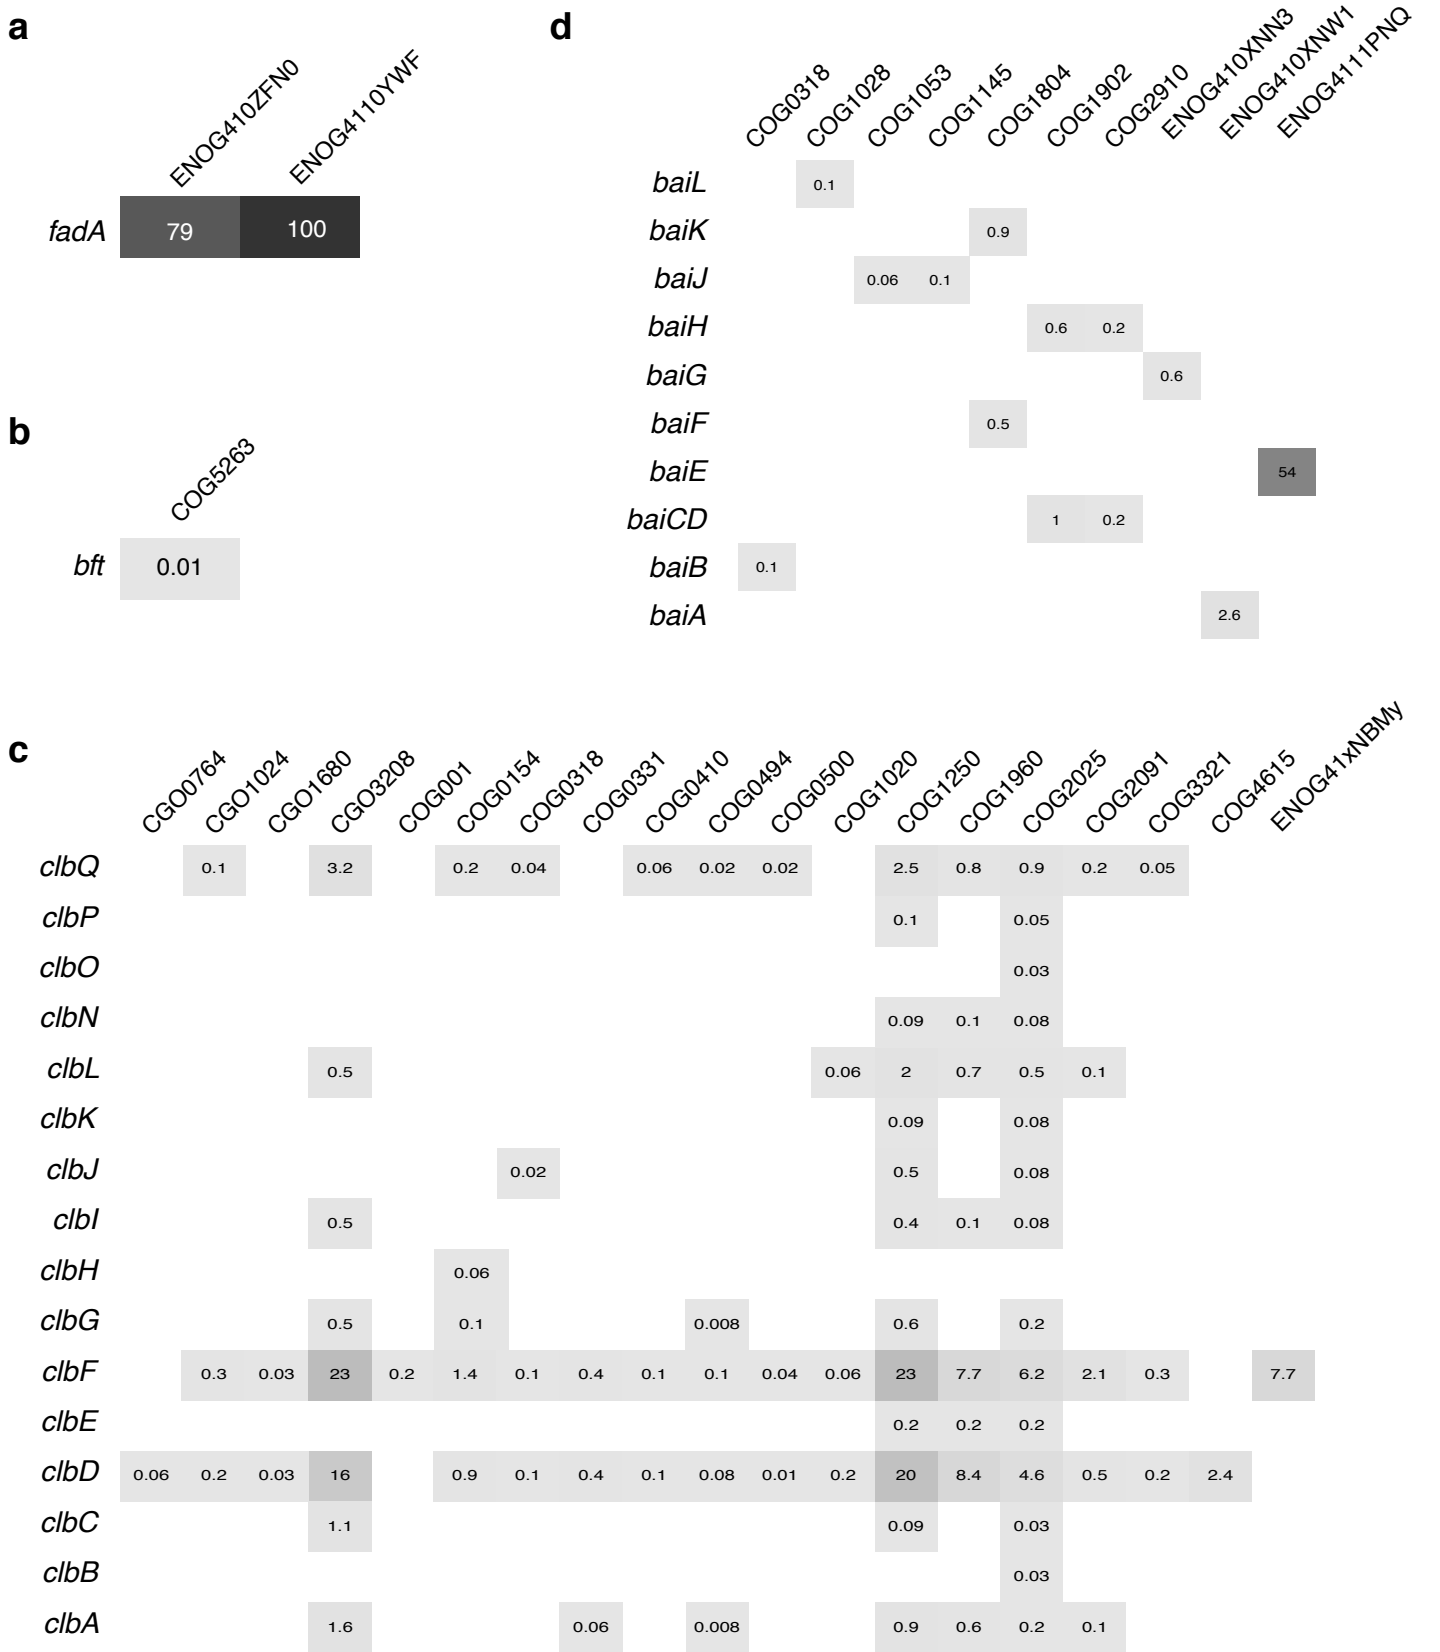

**Figure S5: Coverage of HMM hits in the eggNOG database.**

For each HMM used to annotate potential virulence factors and toxins (see Methods and Fig. 4c), the resulting matches in the IGC were compared to how many genes in the IGC are annotated with overlapping eggNOG orthologous groups. The values in the heatmap represent the percentage of all genes in the IGC annotated with the respective eggNOG orthologous group that were captured by the HMM. Since *fadA* (a) and *bft* (b) are single-gene factors, a single HMM was trained in both cases, whereas multiple different HMMs were trained for the individual gene functions of *pks* (c) and the *bai* operon (d). With the exception of *fadA* and the *baiE* gene, the eggNOG orthologous groups are generally much broader and encompass a magnitude more genes in the IGC than the HMM hits.

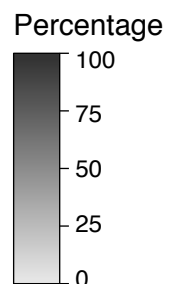

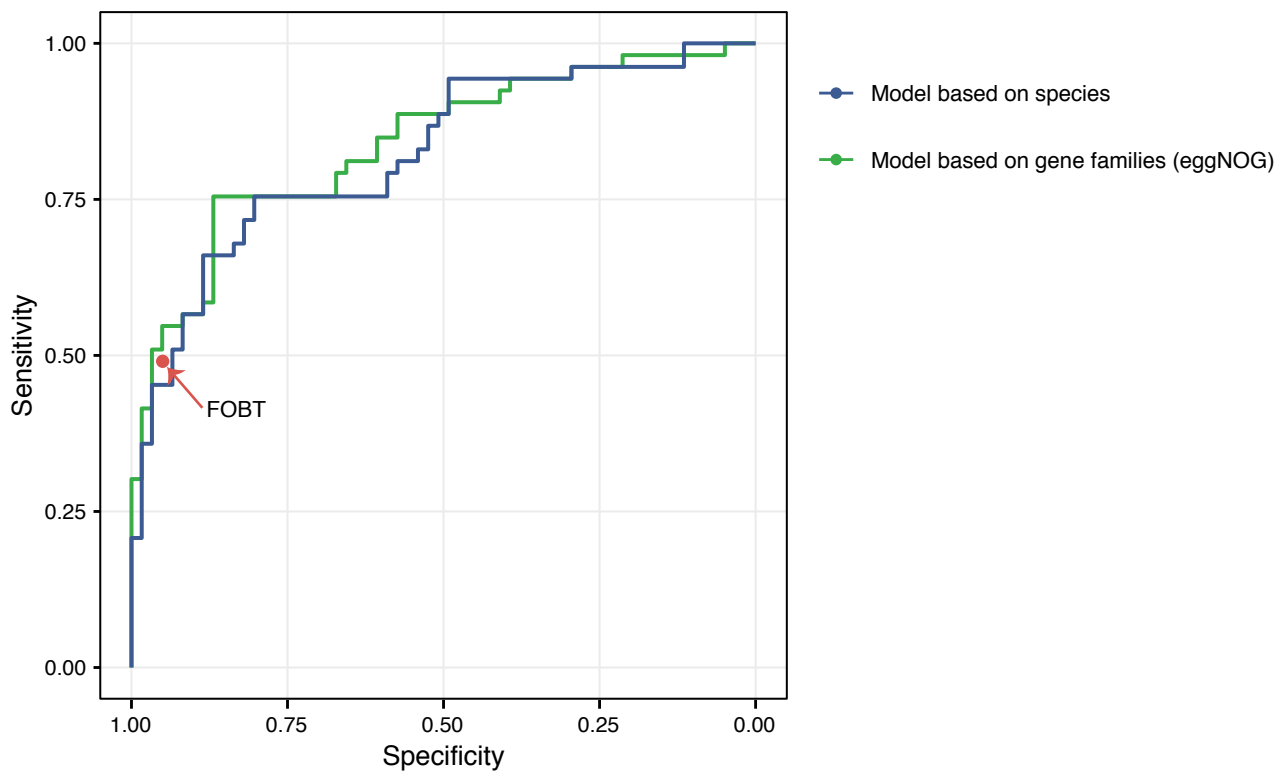

**Figure S6: Models based on taxonomic or functional profiles detect CRC as accurately as the fecal occult blood test (FOBT)**

Receiver operating characteristics for the leave-one-study-out (LOSO) models based on species abundances and eggNOG gene families for the FR study (the only dataset for which FOBT results are available) are shown in blue and green, respectively. The accuracy of the FOBT test on the same set of patients is indicated by the red dot.

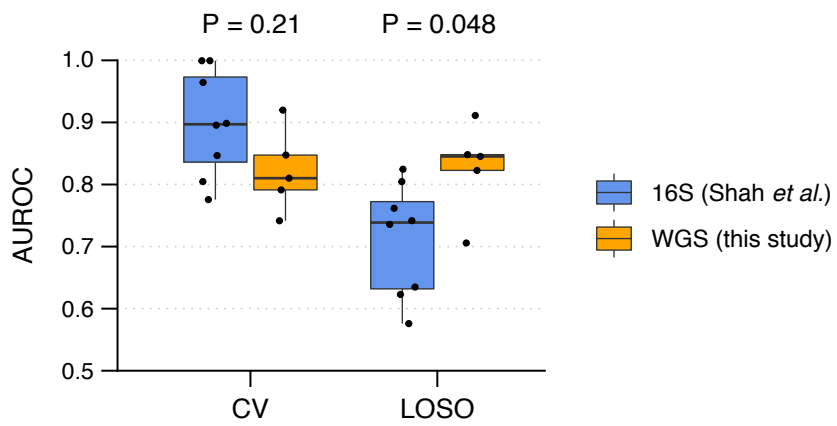

**Figure S7: Comparison of classification accuracies in meta-analyses based on 16S and whole metagenomic sequencing (WGS)**

Model performance as measured by AUROC is compared for cross-validation (CV) and leave-one-study-out (LOSO) models between a meta-analysis based on whole metagenomic sequencing (this study) and another one based on 16S data (see Shah et al., Gut 2018 [11]). For CV, each dot represents the performance of a model trained on a single metagenomic study (included in the respective meta-analysis) in cross-validation, whereas each dot for LOSO shows how well a model trained on all but one study performs on the left-out study. AUROC values for WGS are identical to **Fig. 3ab**. Model performances for 16S were extracted out of the Supplementary Tables 8 and 9 from Shah et al. Gut 2018. Significance was assessed using a two-sided Wilcoxon test ( $n=5$  studies for WGS and  $n=9$  studies for 16S). In all boxplots, boxes denote interquartile ranges (IQR) with the median as thick black line and whiskers extending up to the most extreme points within 1.5-fold IQR.

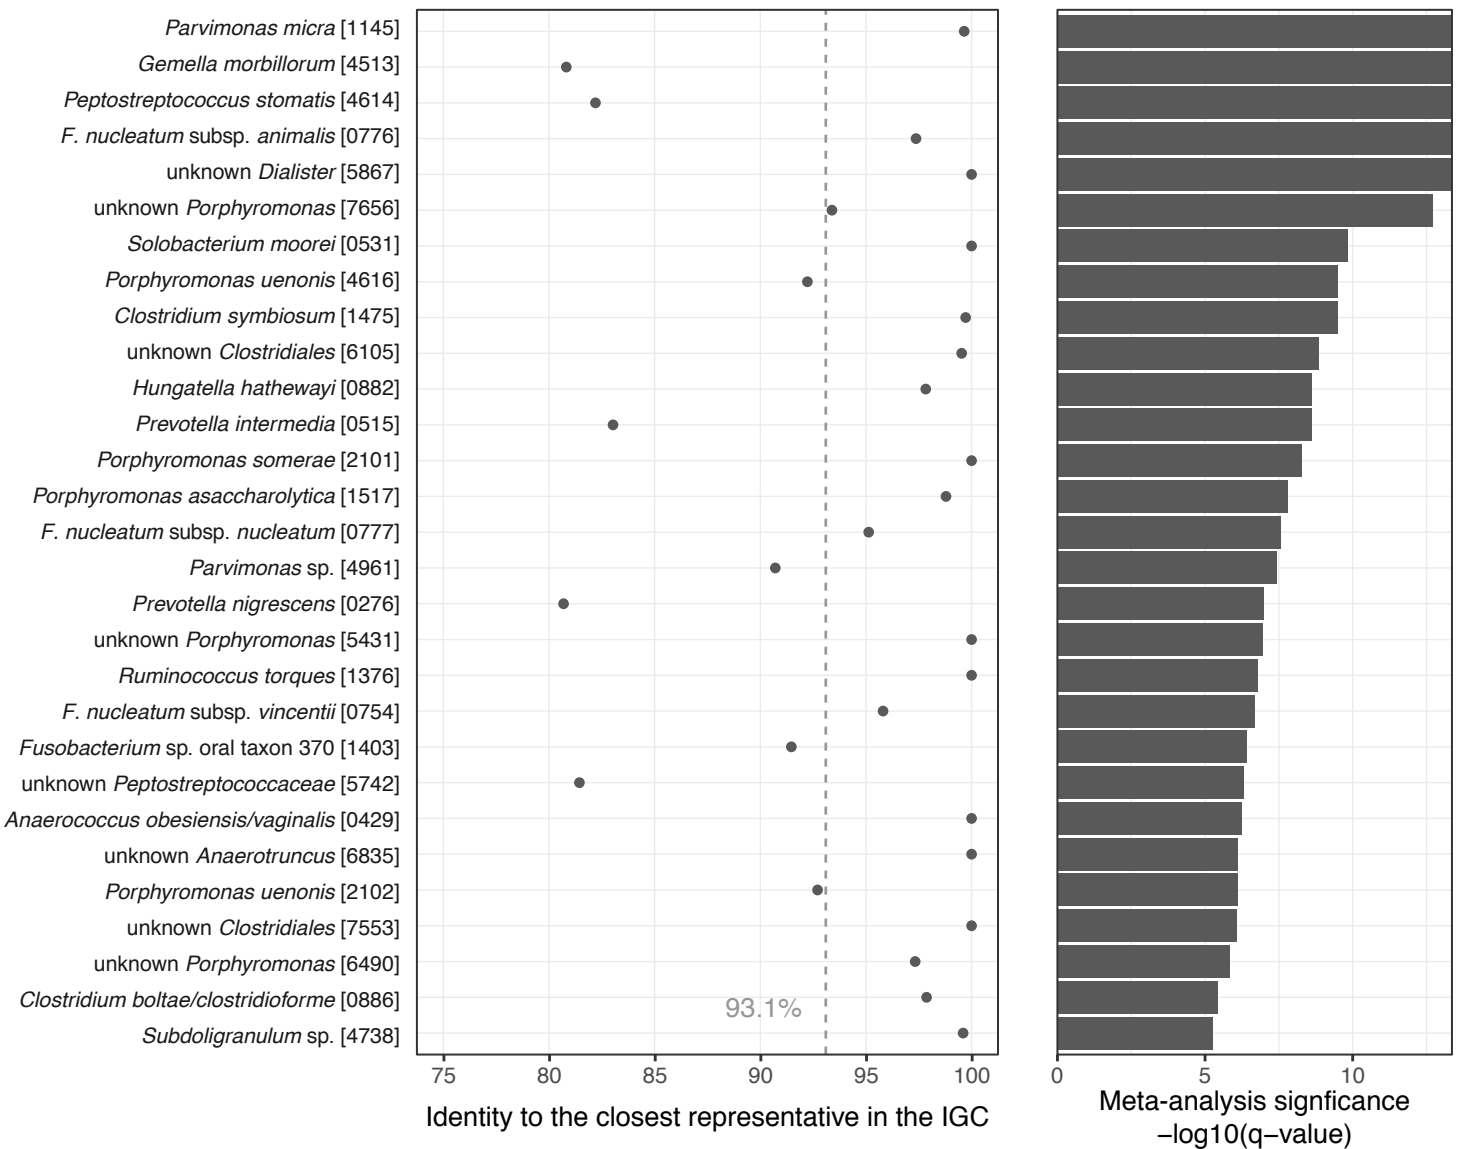

**Figure S8: Matches for COG0533 of the CRC-associated MOTUs in the integrated gene catalogue (IGC)**

For the core set of CRC-associated marker species (see Fig. 1), dots denote the sequence identity of the COG0533 gene used to define the respective MOTU (see Mende et al. *Nature Methods* 2013 [12], Sunagawa et al. *Nature Methods* 2013 [13], Milanese et al. *Nature Communications* 2019 [14], and [motu-tool.org](http://motu-tool.org)) to the closest representative in the integrated gene catalogue (IGC). The dashed line indicates a cutoff of 93.1%, which was determined as species cutoff for this gene (see Supplementary Table 4 in Sunagawa et al. *Nature Methods* 2013). The barplot on the right represents the meta-analysis significance of the CRC enrichment for the respective species (two-sided blocked Wilcoxon test, n=574 independent samples; see Fig. 1a).

All species (rows) to the right of, or close to the dashed line are represented by sequences in the IGC that are likely to originate from the same species (or genus). In contrast, for the remaining five CRC-associated marker species distant from the dashed line, close relatives could not be detected in the IGC indicating that their gene pool (and functional repertoire) is potentially not captured by our functional metagenome annotation workflow due to its reliance on the IGC.

## Supplementary References

1. Zeller, G., et al., *Potential of fecal microbiota for early-stage detection of colorectal cancer*. Mol. Syst. Biol., 2014. **10**(11): p. 766.
2. Feng, Q., et al., *Gut microbiome development along the colorectal adenoma-carcinoma sequence*. Nat. Commun., 2015. **6**: p. 6528.
3. Yu, J., et al., *Metagenomic analysis of faecal microbiome as a tool towards targeted non-invasive biomarkers for colorectal cancer*. Gut, 2017. **66**(1): p. 70-78.
4. Vogtmann, E., et al., *Colorectal Cancer and the Human Gut Microbiome: Reproducibility with Whole-Genome Shotgun Sequencing*. PLoS One, 2016. **11**(5): p. e0155362.
5. Thomas, A.M., et al., *Metagenomic analysis of colorectal cancer datasets identifies cross-cohort microbial diagnostic signatures and a link with choline degradation*. co-submitted to Nature Medicine, 2018.
6. Hirayama, A., et al., *Quantitative metabolome profiling of colon and stomach cancer microenvironment by capillary electrophoresis time-of-flight mass spectrometry*. Cancer Res, 2009. **69**(11): p. 4918-25.
7. Denkert, C., et al., *Metabolite profiling of human colon carcinoma--deregulation of TCA cycle and amino acid turnover*. Mol Cancer, 2008. **7**: p. 72.
8. Mal, M., et al., *Metabotyping of human colorectal cancer using two-dimensional gas chromatography mass spectrometry*. Anal Bioanal Chem, 2012. **403**(2): p. 483-93.
9. Weir, T.L., et al., *Stool microbiome and metabolome differences between colorectal cancer patients and healthy adults*. PLoS One, 2013. **8**(8): p. e70803.
10. Mandal, S., et al., *Analysis of composition of microbiomes: a novel method for studying microbial composition*. Microb Ecol Health Dis, 2015. **26**: p. 27663.
11. Mende, D.R., et al., *proGenomes: a resource for consistent functional and taxonomic annotations of prokaryotic genomes*. Nucleic Acids Res., 2017. **45**(D1): p. D529-D534.
12. Shah, M.S., et al., *Leveraging sequence-based faecal microbial community survey data to identify a composite biomarker for colorectal cancer*. Gut, 2018. **67**(5): p. 882-891.
13. Mende, D.R., et al., *Accurate and universal delineation of prokaryotic species*. Nat. Methods, 2013. **10**(9): p. 881-884.
14. Sunagawa, S., et al., *Metagenomic species profiling using universal phylogenetic marker genes*. Nat. Methods, 2013. **10**(12): p. 1196-1199.
15. Milanese, A., et al., *Microbial abundance, activity, and population genomic profiling with mOTUs*. Nature Communications, 2019. **formally accepted for publication**.
